# Supplementary material for: Precise and selective macroscopic assembly of a dual lock-and-key structured hydrogel
Source: Royal Society of Chemistry journal article supplement (doi:10.1039/d3mh00995e), 2023-10-31
Supplement: d3mh00995e1.pdf [file d3mh00995e1.pdf]

## Supplementary Information

### **Precise and Selective Macroscopic Assembly of Dual Lock-and-Key Structured Hydrogel**

Eunseok Heo <sup>a</sup>, Wooseop Hwang <sup>b</sup>, Hye Been Koo <sup>a</sup>, Steve Park <sup>a</sup>, Do-Nyun Kim <sup>c</sup>, Ho-Young Kim <sup>c</sup>,  
YongJoo Kim <sup>b</sup>, and Jae-Byum Chang<sup>\*ad</sup>

<sup>a</sup>*Department of Materials Science and Engineering, Korea Advanced Institute of Science and Technology (KAIST), Daejeon, 34141, Republic of Korea*

<sup>b</sup>*Department of Materials Science and Engineering, Kookmin University, Seoul 02707, Republic of Korea*

<sup>c</sup>*Department of Mechanical Engineering, Seoul National University, Seoul 08826, Republic of Korea*

<sup>d</sup>*Department of Biological Sciences, Korea Advanced Institute of Science and Technology (KAIST), Daejeon 34141, Republic of Korea*

*\*E-mail: jbchang03@kaist.ac.kr*

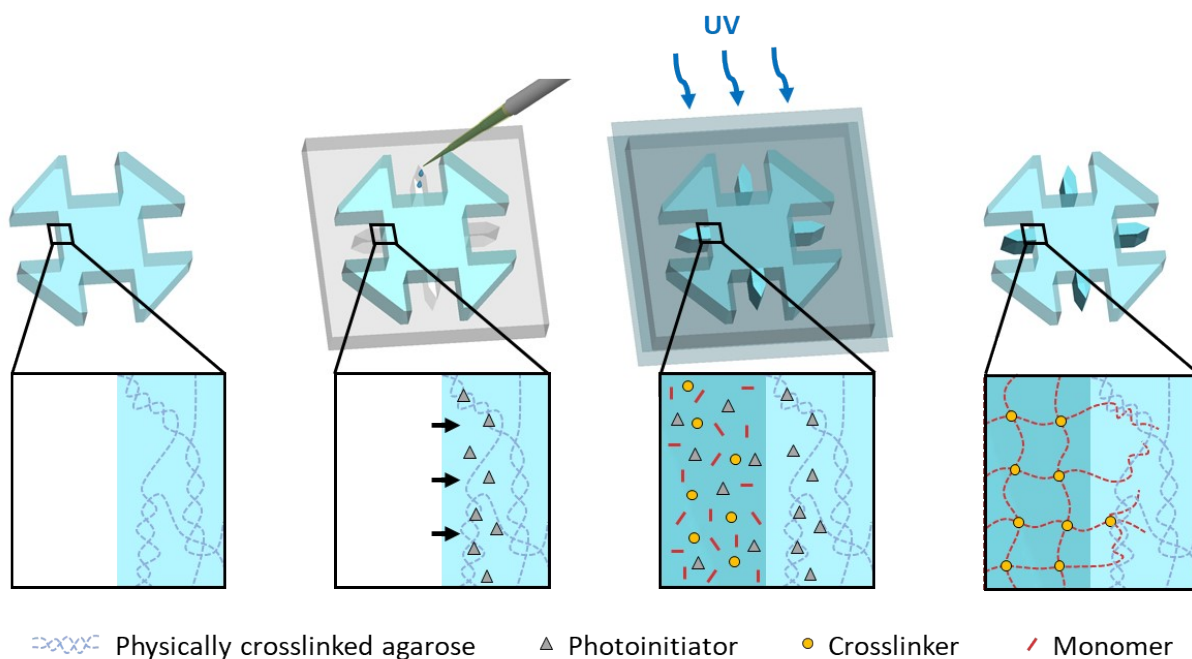

**Fig. S1** Schematic illustration of the overall fabrication process for the chemically heterogeneous hydrogel building blocks.

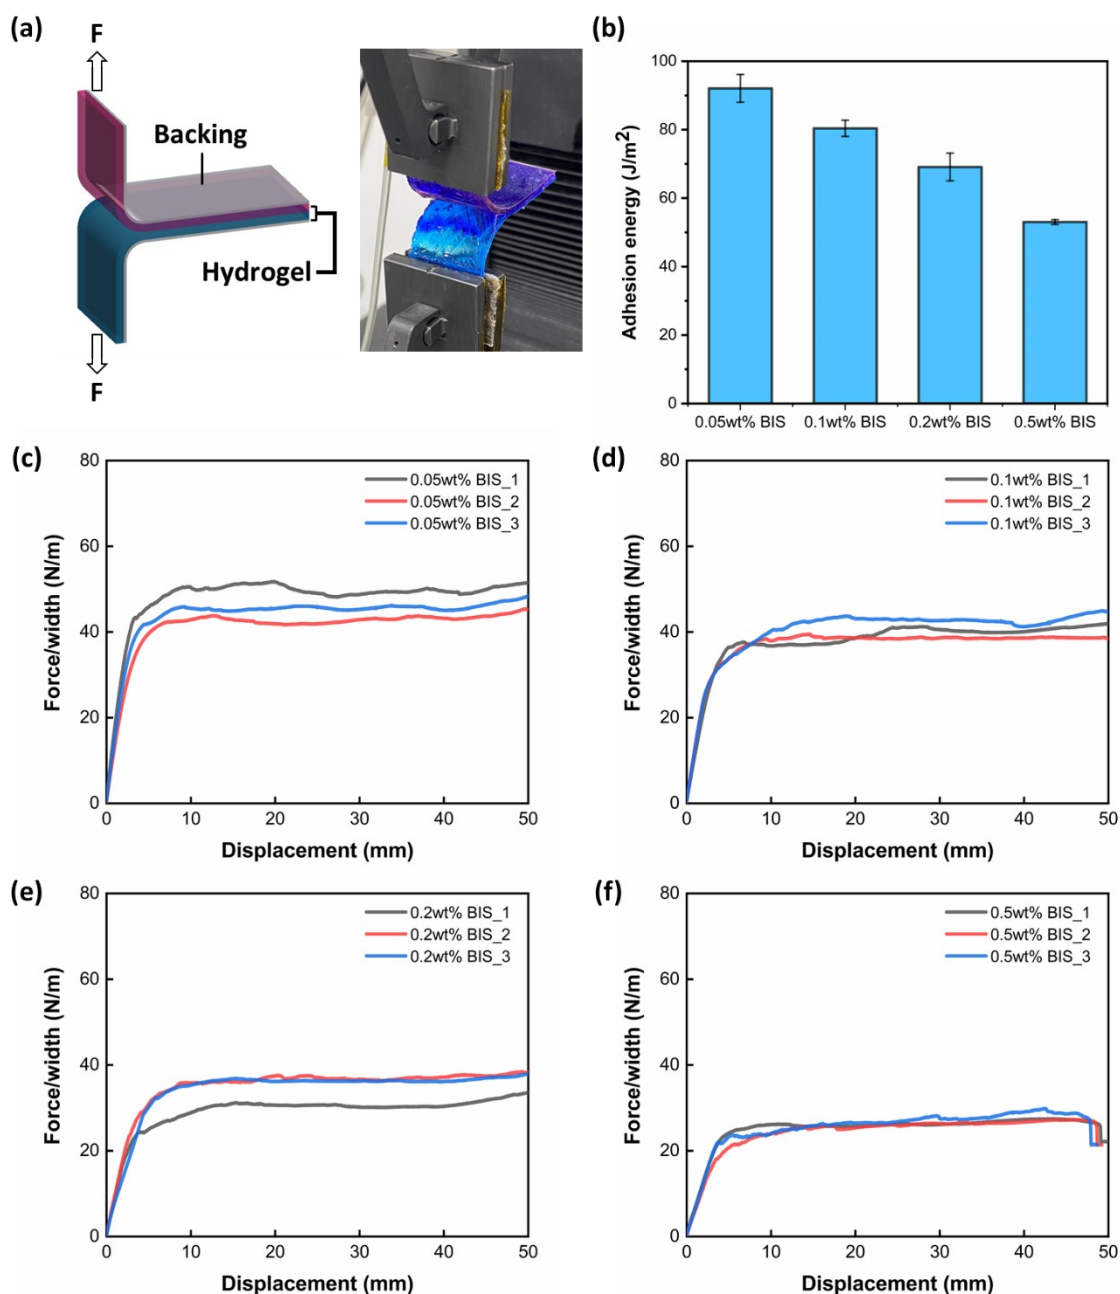

**Fig. S2** (a) Schematic illustration and experimental image of a 180°-peeling test. (b) Adhesion energies between the oppositely charged hydrogels, varying the crosslinker concentrations. Representative force/width-displacement curved of the 180°-peeling test with crosslinker concentrations of (c) 0.05 wt%, (d) 0.1 wt%, (e) 0.2 wt%, and (f) 0.5 wt%.

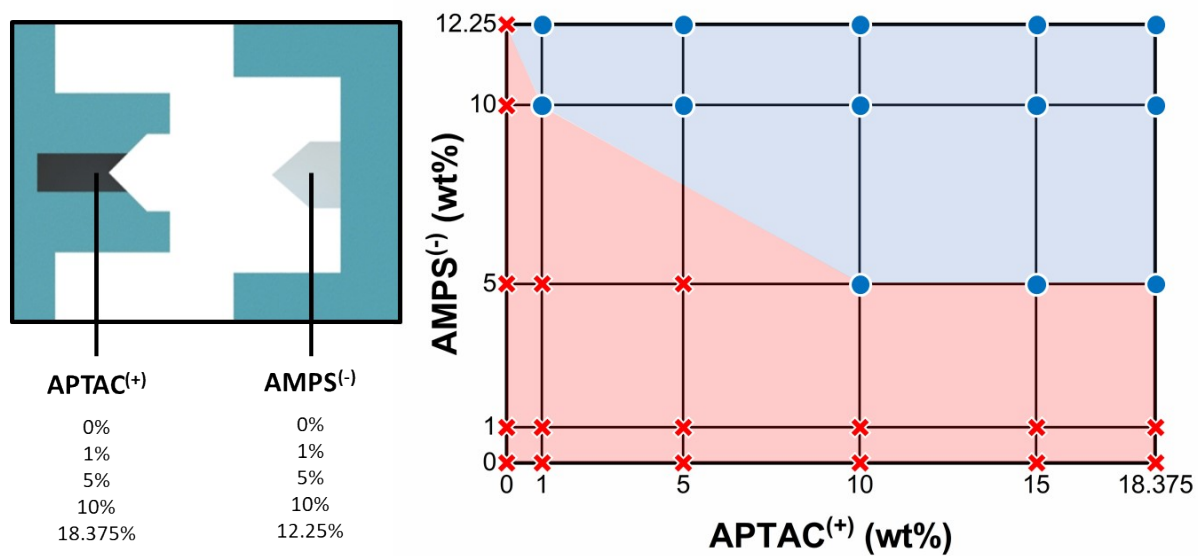

**Fig. S3** Assembly stability test between charged hydrogels by varying the concentration of positively and negatively charged monomers.

(a) Single lock-and-key

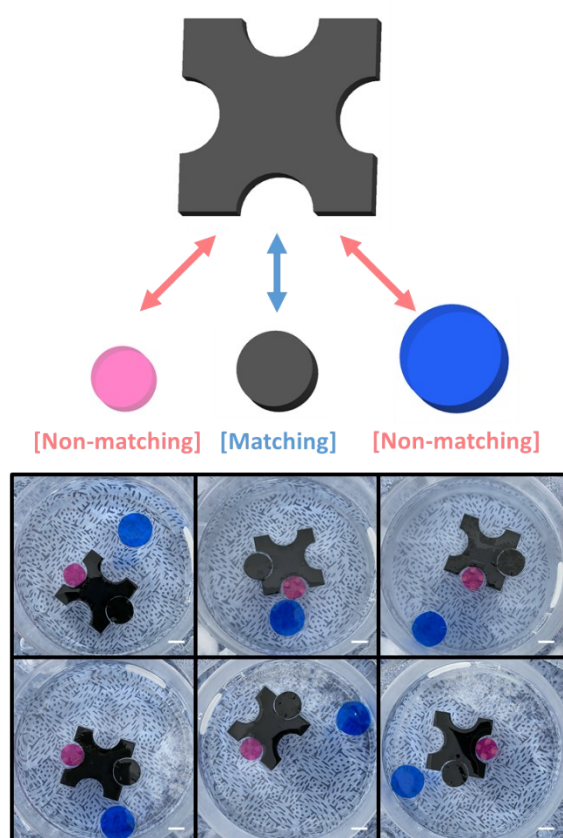

(b) Dual lock-and-key

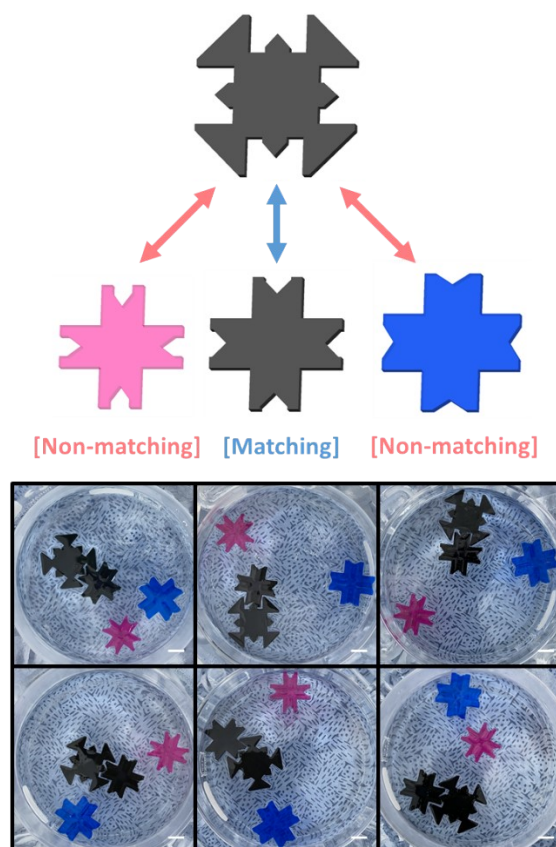

**Fig. S4** Design schematics and experimental images displaying (a) assembly using the single lock-and-key structures, and (b) assembly using the dual lock-and-key structures. Scale bars: 1 cm.

**(a) Inner lock-and-key-controlled assembly**

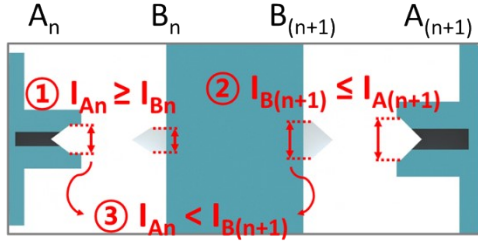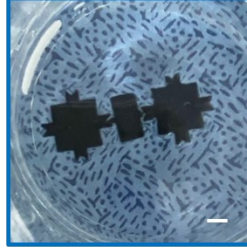

Matching pairs: 56%  
(5/9)

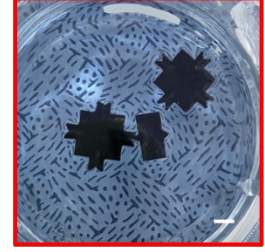

Non-matching pairs: 44%  
(4/9)

**(b) Outer lock-and-key-controlled assembly**

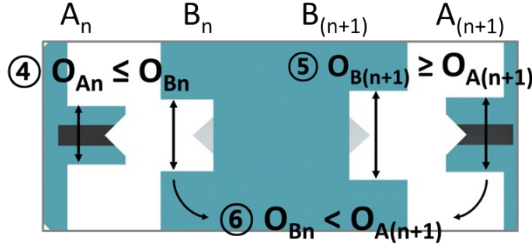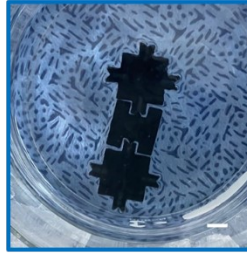

Matching pairs: 78%  
(7/9)

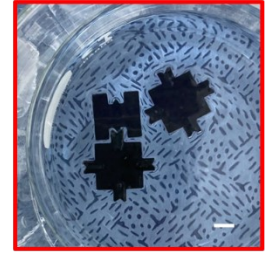

Non-matching pairs: 22%  
(2/9)

**(c) Dual lock-and-key-controlled assembly**

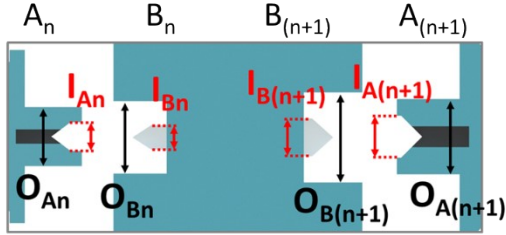

[Satisfies both ①–③, ④–⑥]

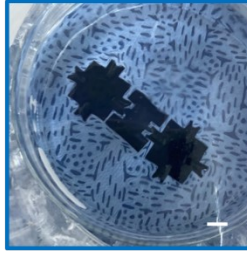

Matching pairs: 100%  
(9/9)

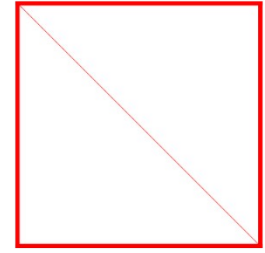

Non-matching pairs: 0%  
(0/9)

**Fig. S5** Design schematics and assembly yields of the building blocks to assess the accuracy of the dual lock-and-key-assisted selective assembly when controlled by (c) the inner lock-and-key only, (d) the outer lock-and-key only, and (e) the dual lock-and-key. Scale bars: 1 cm.

| Inner lock-and-key only |                                   | Outer lock-and-key only |                                   | Dual lock-and-key |                                   |
|-------------------------|-----------------------------------|-------------------------|-----------------------------------|-------------------|-----------------------------------|
| Matching pair           | $A_n - [B_n - B_{n+1}] - A_{n+1}$ | Matching pair           | $A_n - [B_n - B_{n+1}] - A_{n+1}$ | Matching pair     | $A_n - [B_n - B_{n+1}] - A_{n+1}$ |
|                         |                                   |                         |                                   |                   |                                   |
| Non-matching pair       | $A_{n+1} - [B_n - B_{n+1}] - X$   | Non-matching pair       | $X - [B_n - B_{n+1}] - A_n$       | Non-matching pair | -                                 |
|                         |                                   |                         |                                   |                   | -                                 |

**Fig. S6** Schematic illustrations of the possible matches and non-matches between the hydrogel building blocks, controlled by the two lock-and-keys depicted in Fig. 2c-e.

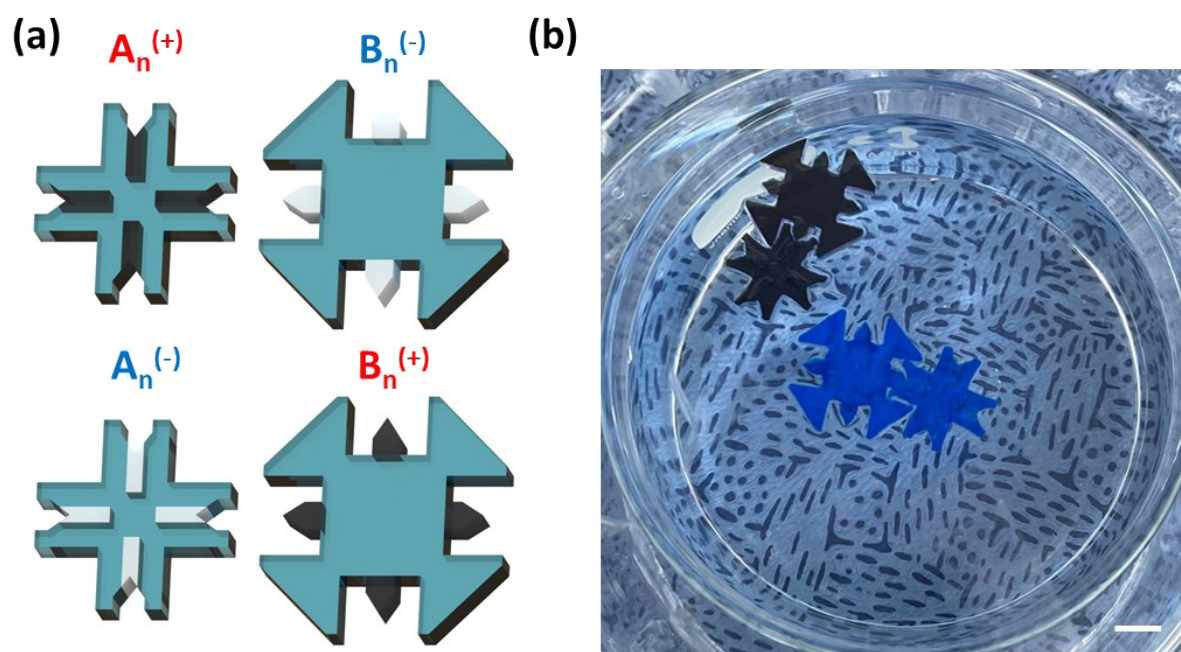

**Fig. S7** (a) Schematic illustrations of two hydrogel building blocks with identical designs but different charge arrays. (b) Experimental image demonstrating selective assembly only between oppositely charged pairs. Scale bars: 1 cm.

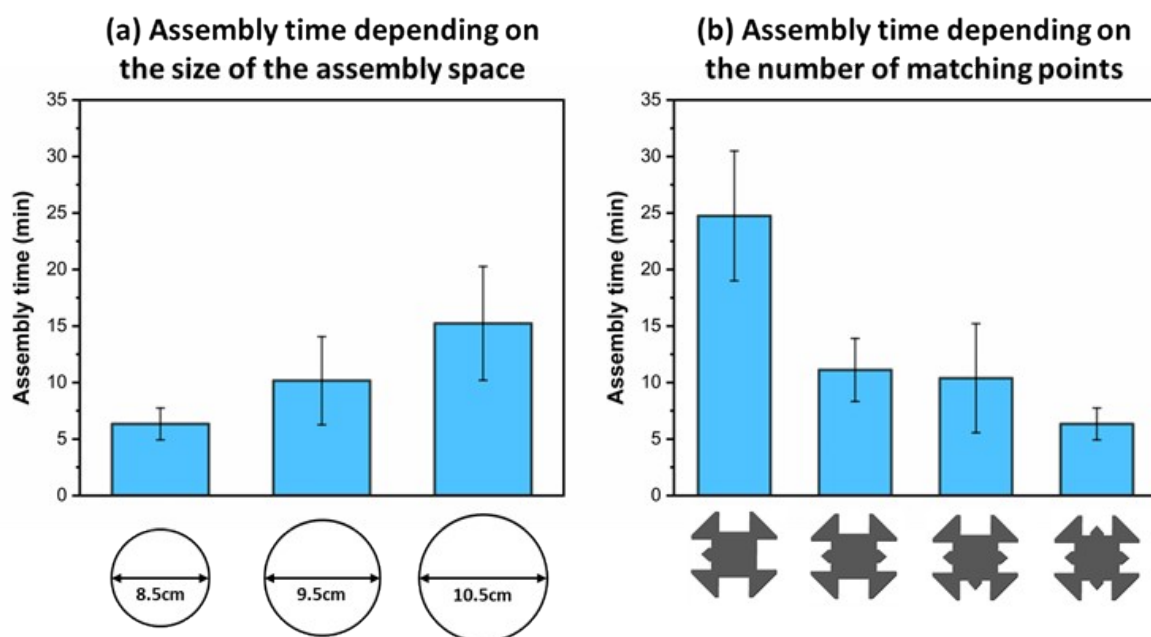

**Fig. S8** Graphs depicting the time consumed for assembly using the dual lock-and-key structure depending on (a) the size of the assembly space while maintaining four matching points ( $n=5$  for each case), and (b) the number of matching points in a single building block with an 8.5 cm dish size ( $n=5$  for each case). The size of the hydrogel building blocks was 23.8 mm in width, while the size of the corresponding matching pair was 19.8 mm.

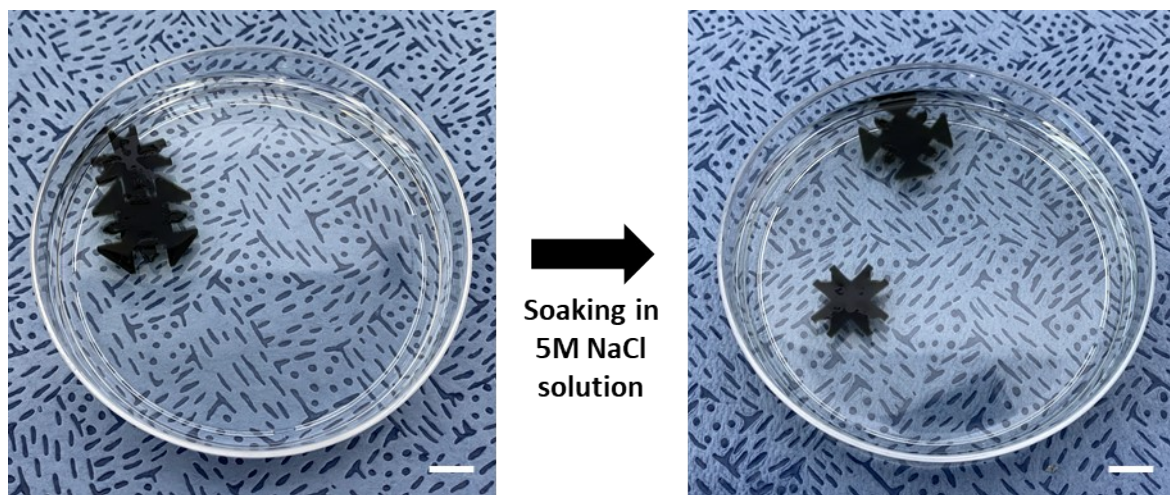

**Fig. S9** Experimental images of demand detachment of the assembled hydrogel building blocks under salt conditions. Scale bars: 1 cm.

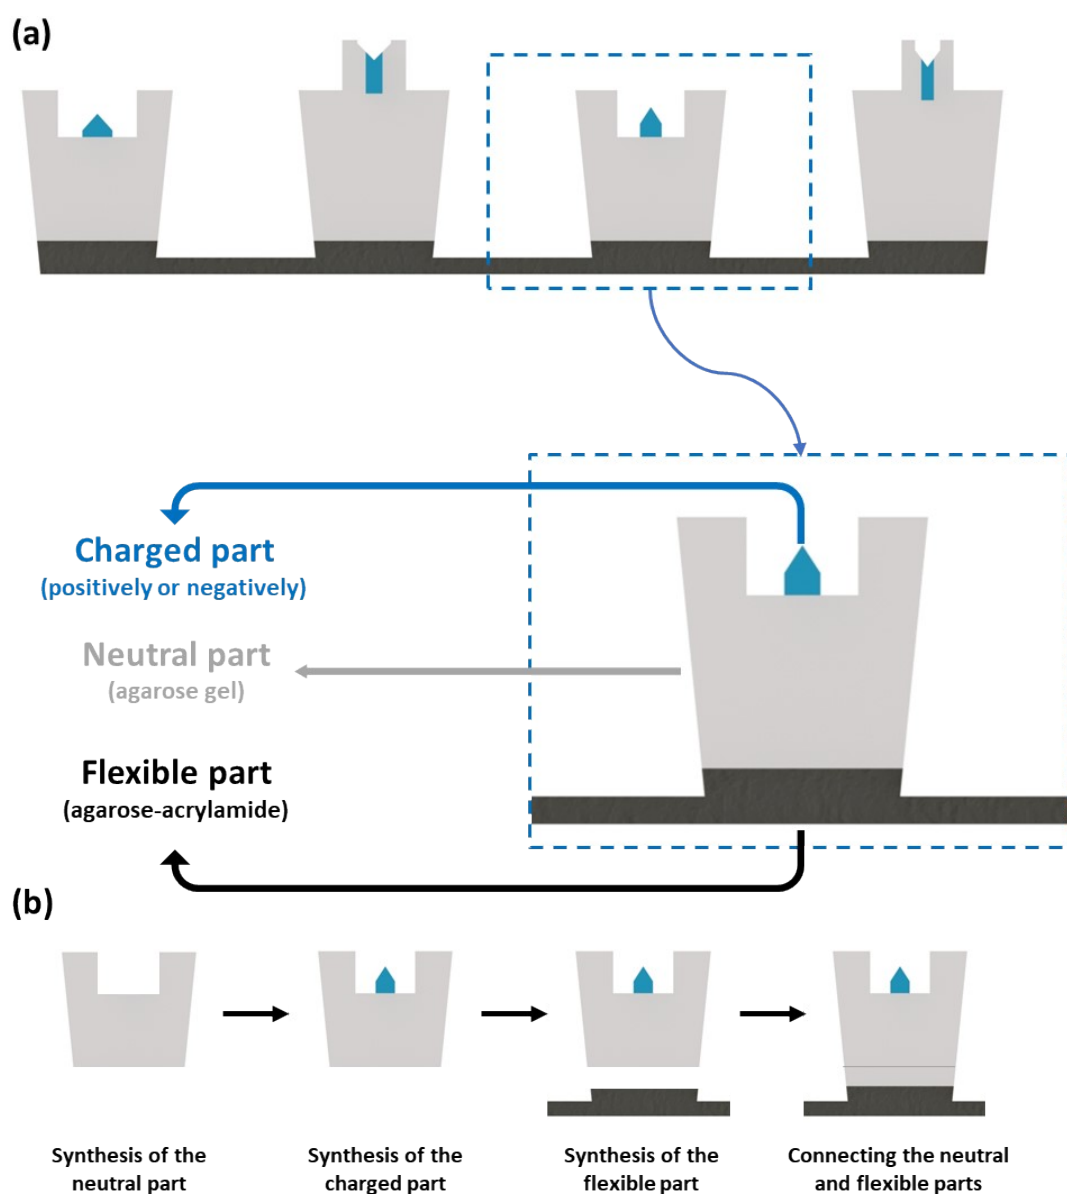

**Fig. S10** (a) Schematic illustrations of DNA-mimicking double-stranded structures, consisting of three components: a charged part, a neutral part, and a flexible part. (b) Synthesis procedure for DNA-mimicking structures.

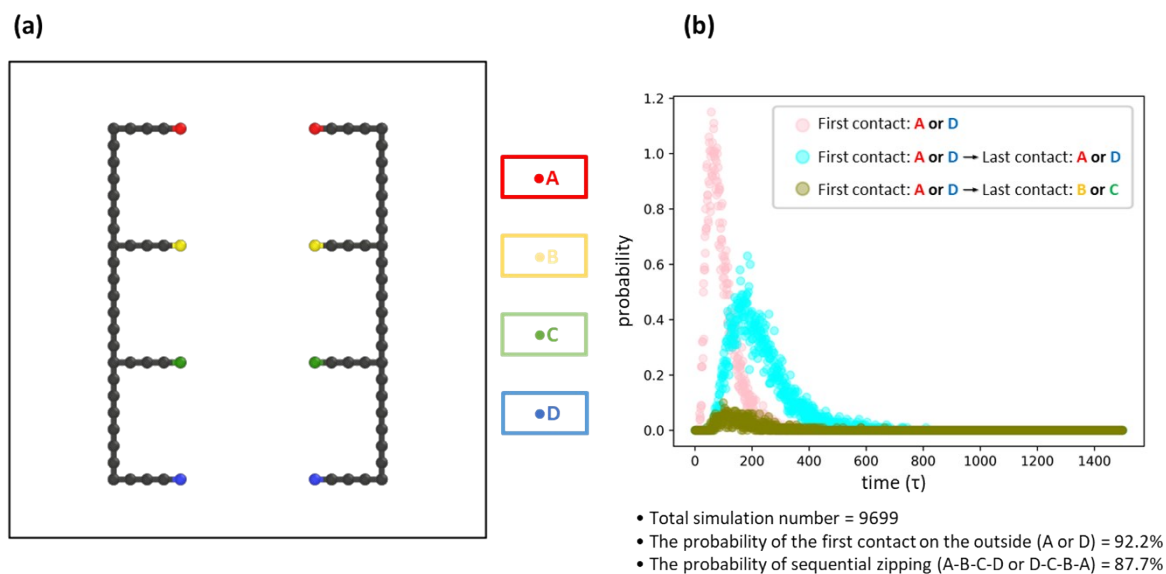

**Fig. S11** (a) Designed model of a DNA-mimicking structure for molecular dynamics simulation.  
(b) Graph depicting the probability of the assembly spot for the first and last contact.

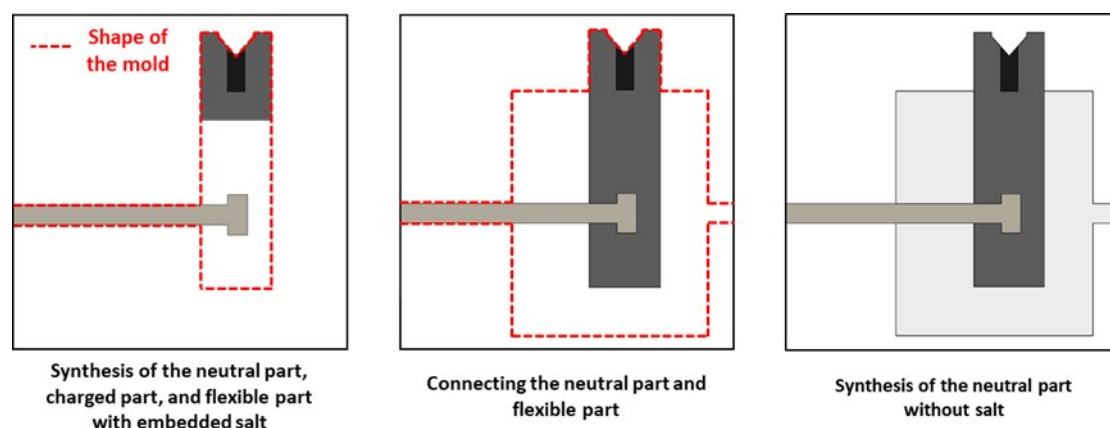

**Fig. S12** Synthesis procedure for the hydrogel-based logic gate.

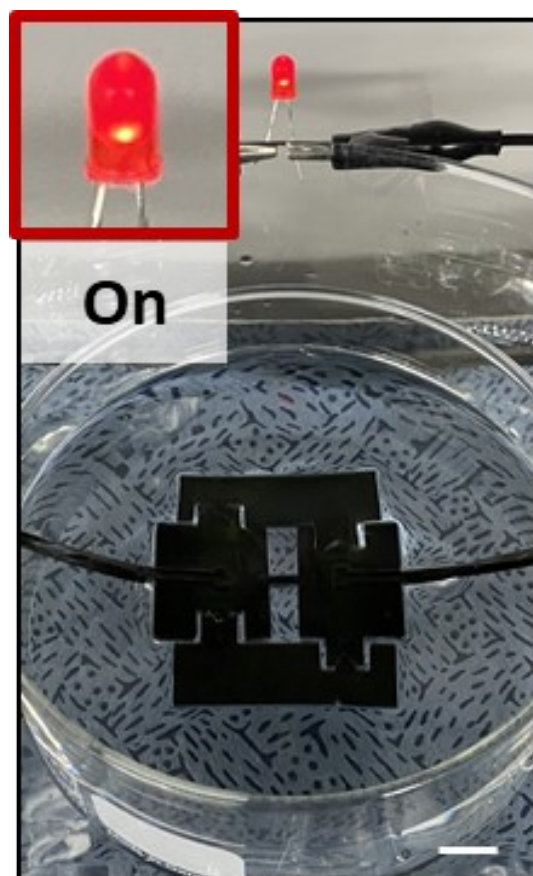

**Fig. S13** Experimental image showing the connection of the two complementary building blocks to the main part in the OR logic gate.
